# Supplementary material for: Novel high–throughput myofibroblast assays identify agonists with therapeutic potential in pulmonary fibrosis that act via EP2 and EP4 receptors
Source: PubMed Central journal article supplement (PMC6261607; doi:10.1371/journal.pone.0207872), 2018-11-28

# S6 Fig A

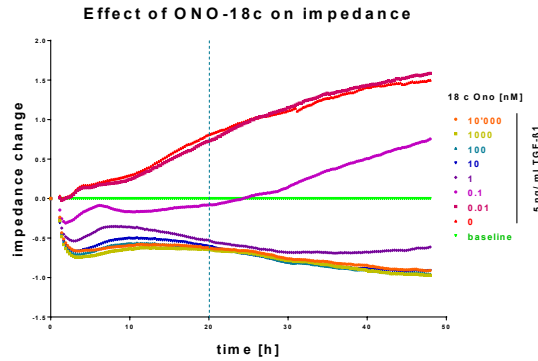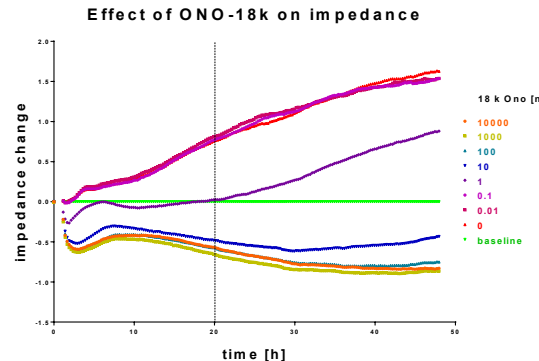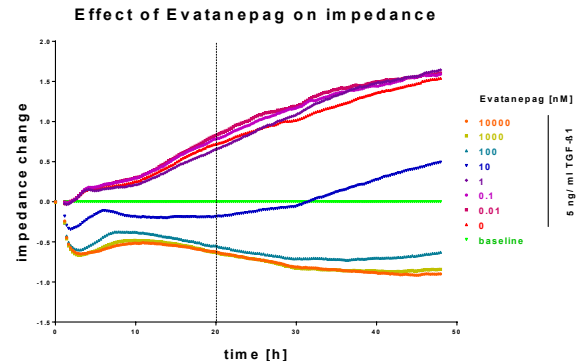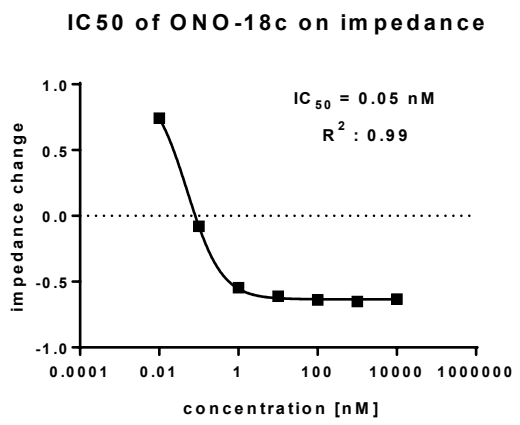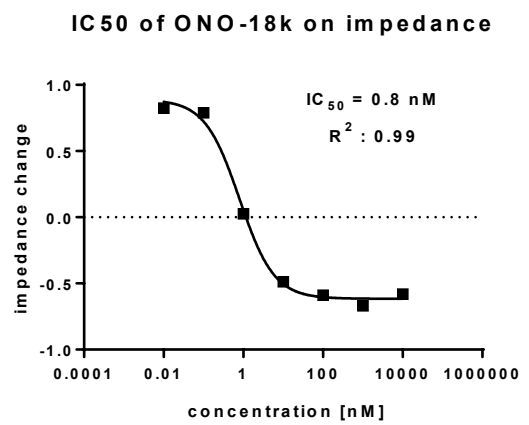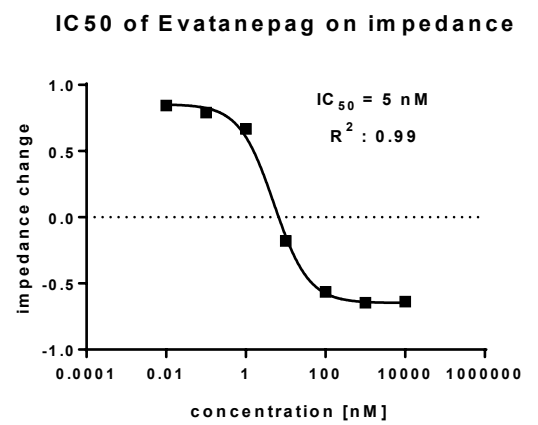

**B**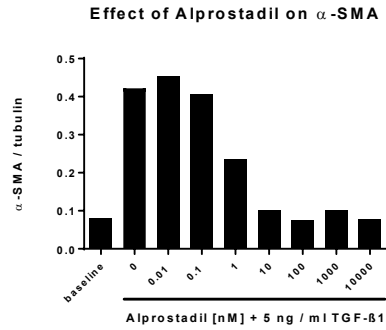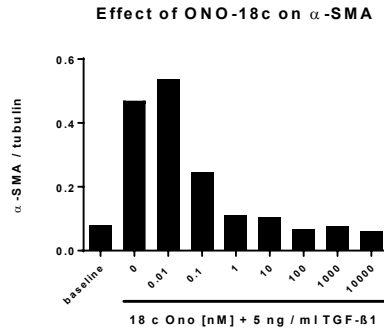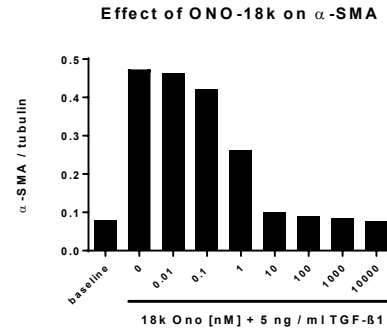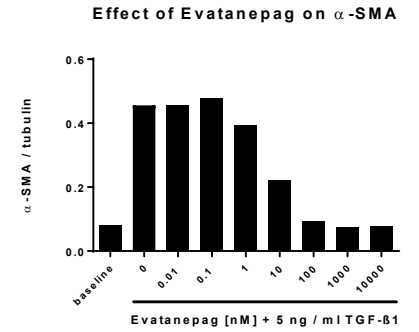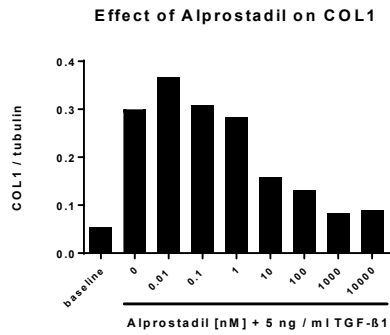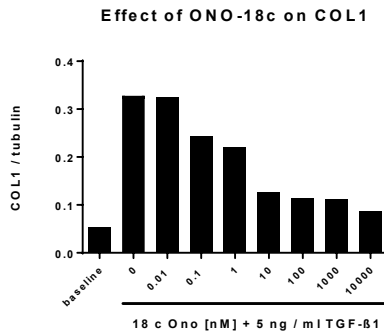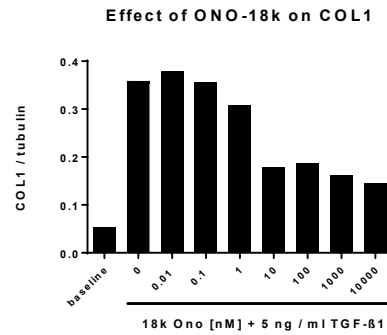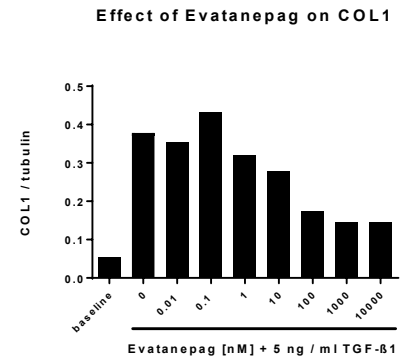

**C**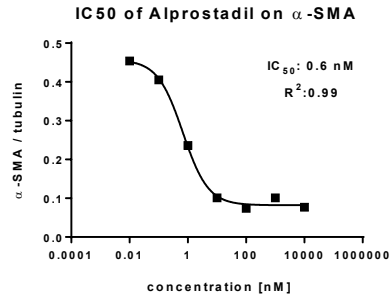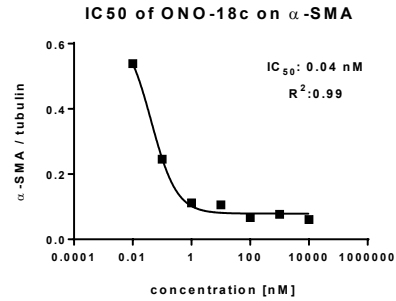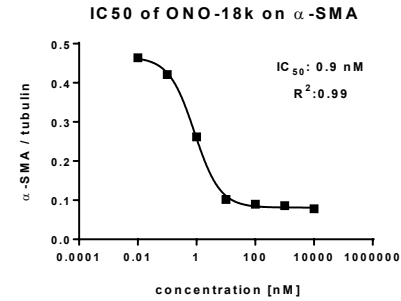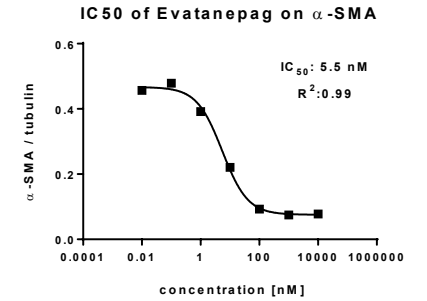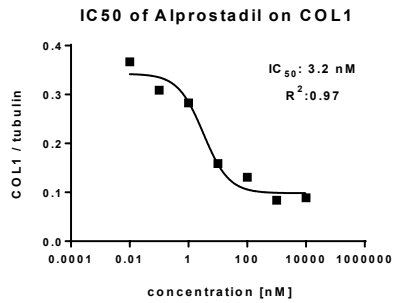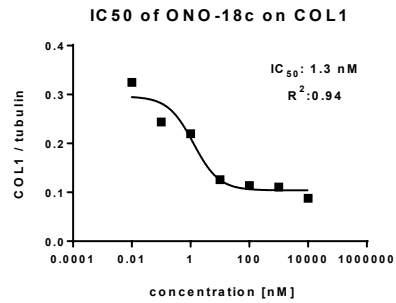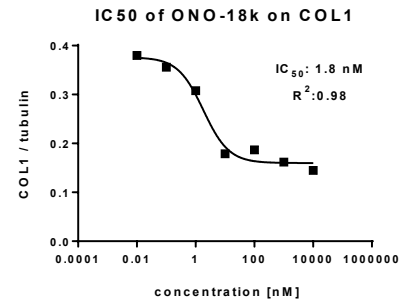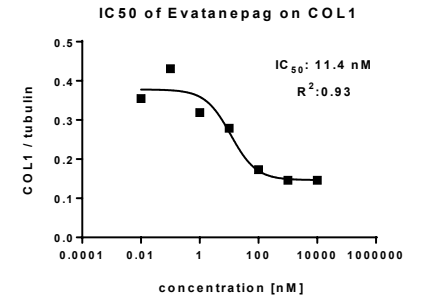

Supplement: pone.0207872.s010.pdf [file pone.0207872.s010.pdf]
