# Supplementary material for: Novel high–throughput myofibroblast assays identify agonists with therapeutic potential in pulmonary fibrosis that act via EP2 and EP4 receptors
Source: PubMed Central journal article supplement (PMC6261607; doi:10.1371/journal.pone.0207872), 2018-11-28

# S7 Fig

## A

t 0 - 24 h

5ng/ml TGF- $\beta$ 1

t 24 - 96 h

25'000

5'000

1'000

200

40

8

1.6

0.32

0.06

0.01

0 [nM]

Digoxigenin

Digoxin

Digitoxigenin

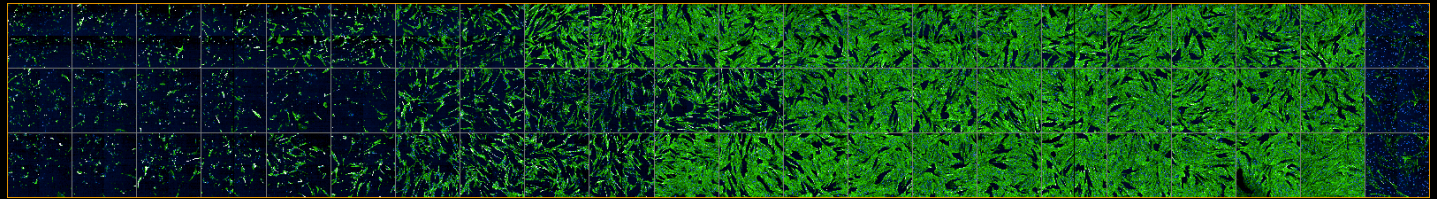

## B

t 0 - 24 h

5ng/ml TGF- $\beta$ 1

t 24 - 96 h

25'000

5'000

1'000

200

40

8

1.6

0.32

0.06

0.01

0 [nM]

Halofuginone

Nintedanib

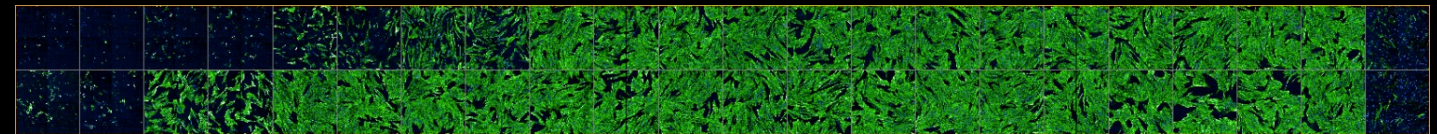

C

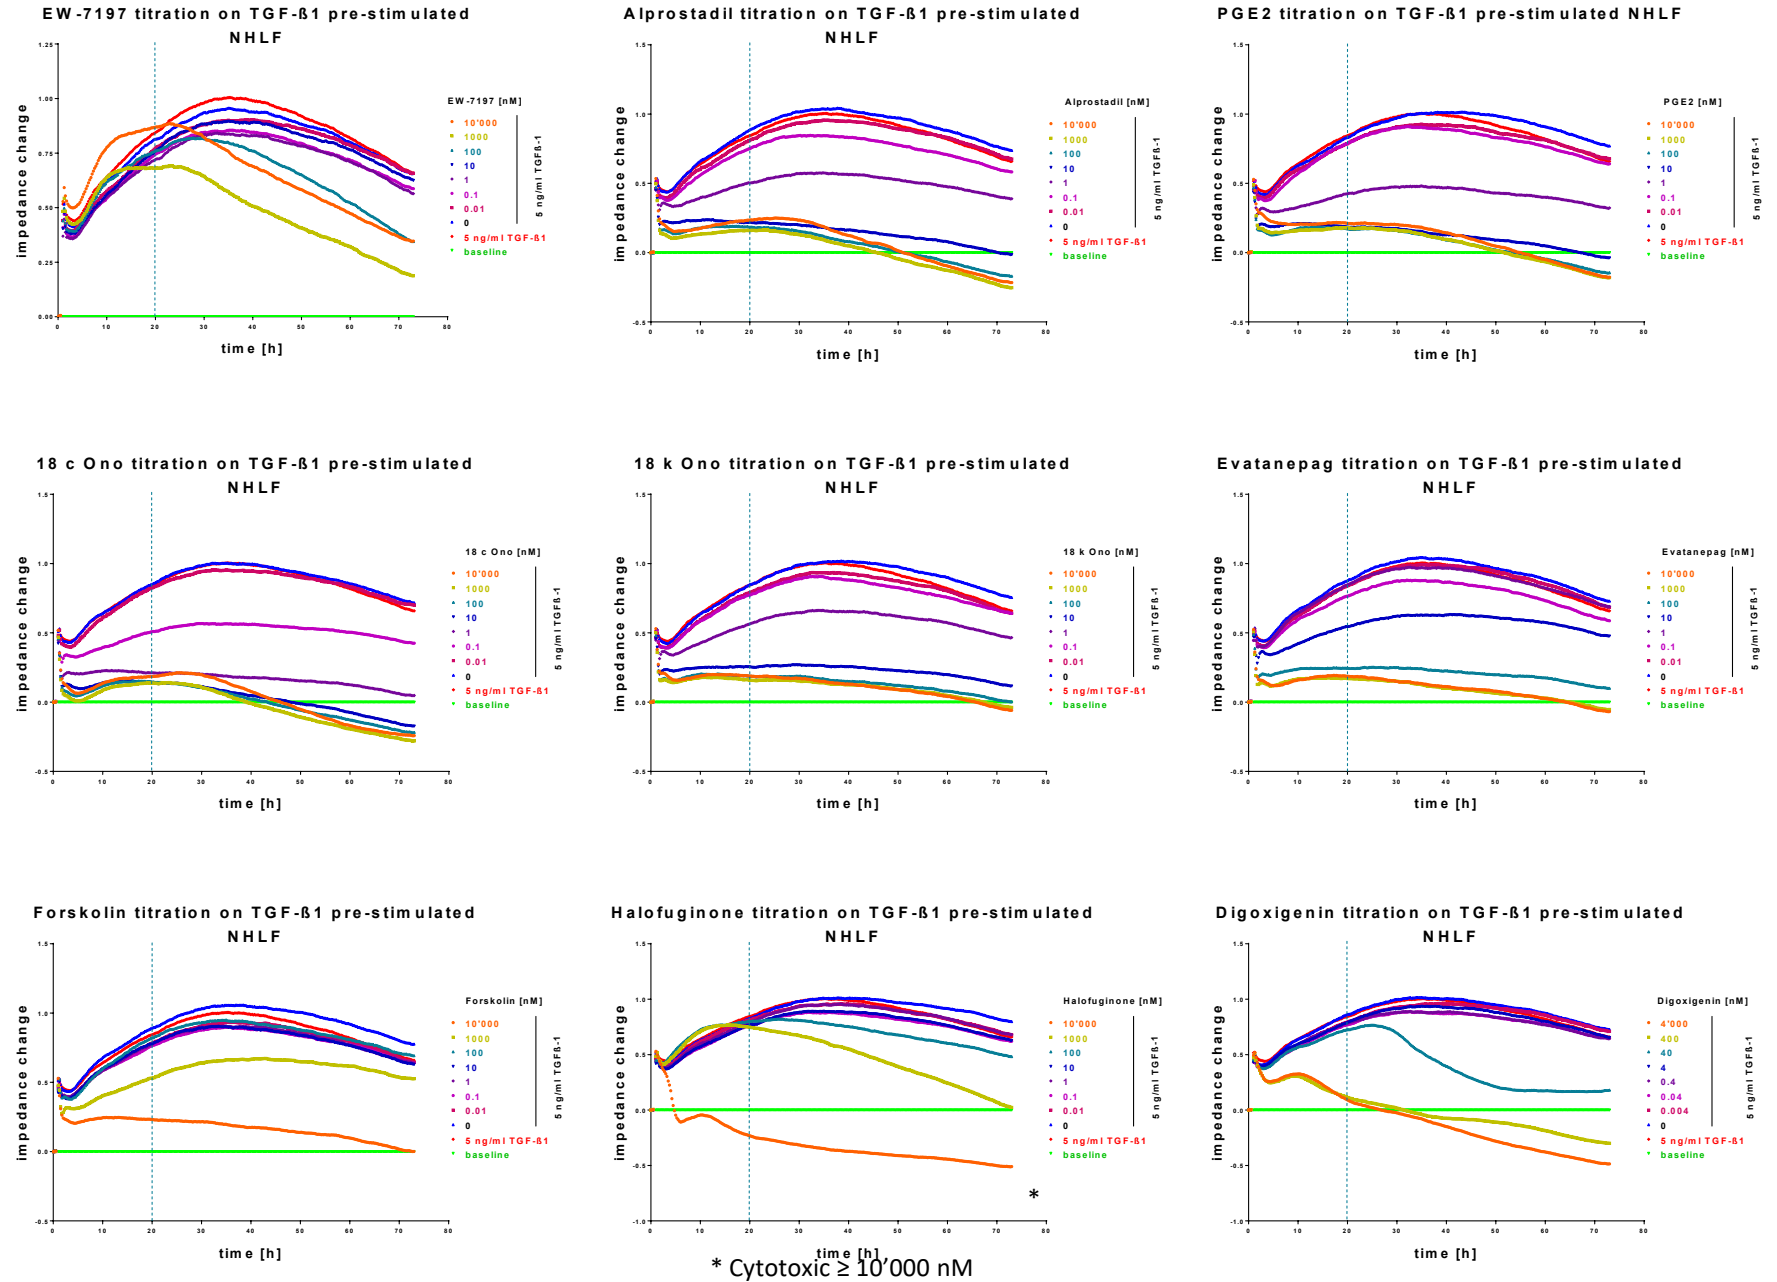

D

**EW-7197 reversal of  $\alpha$ -SMA**

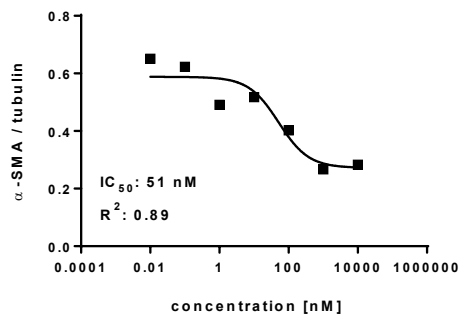

**Alprostadil reversal of  $\alpha$ -SMA**

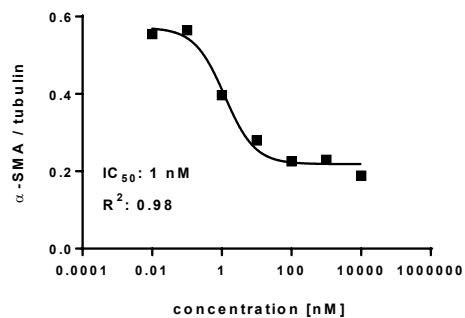

**PGE2 reversal of  $\alpha$ -SMA**

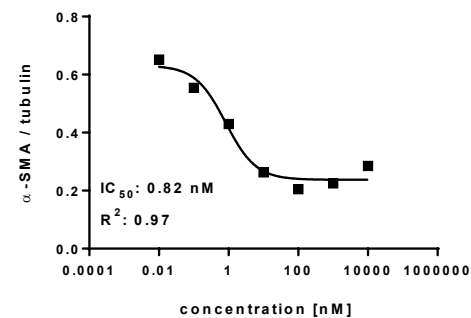

**ONO-18c reversal of  $\alpha$ -SMA**

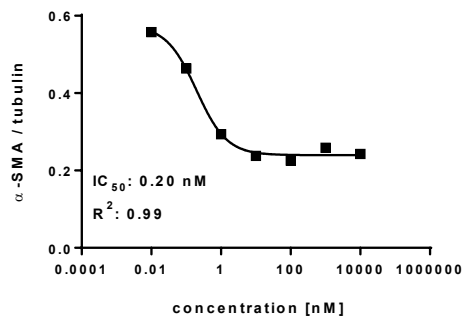

**ONO-18k reversal of  $\alpha$ -SMA**

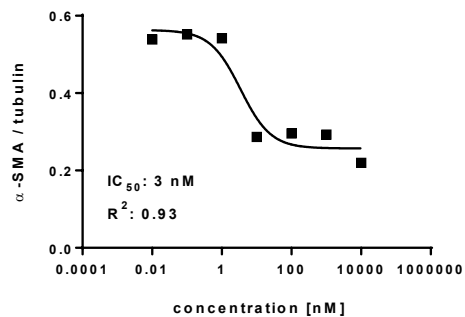

**Evatanepag reversal of  $\alpha$ -SMA**

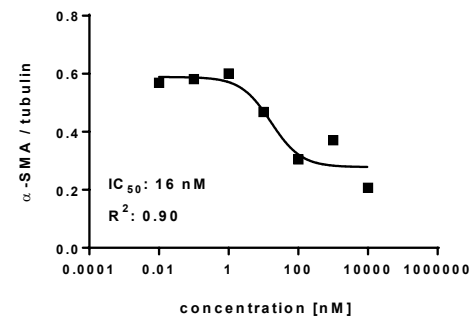

**Forskolin reversal of  $\alpha$ -SMA**

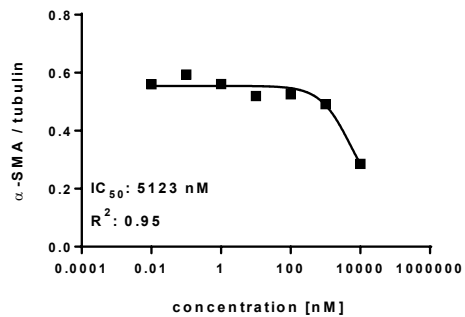

**Halofuginone reversal of  $\alpha$ -SMA**

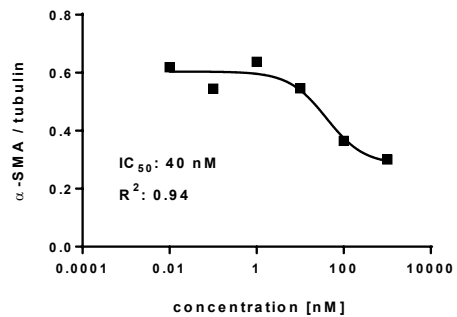

**Digoxigenin reversal of  $\alpha$ -SMA**

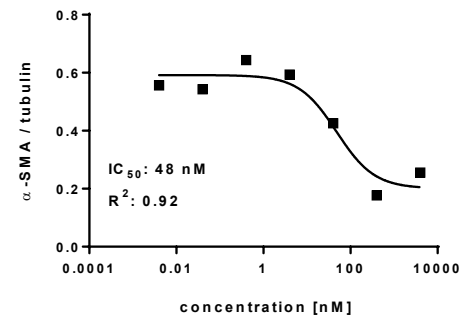

E

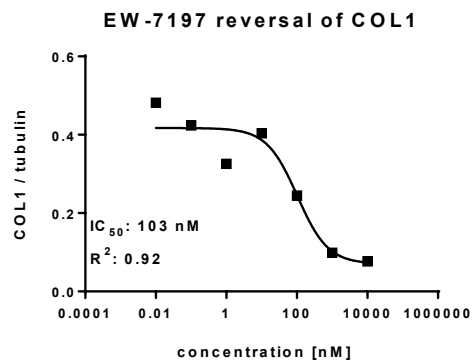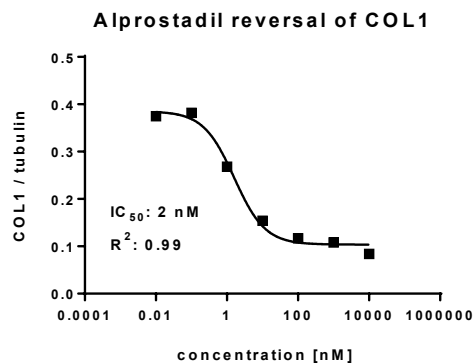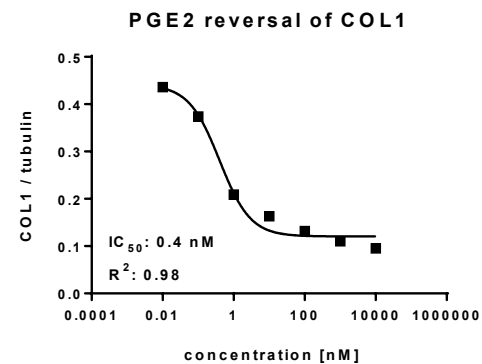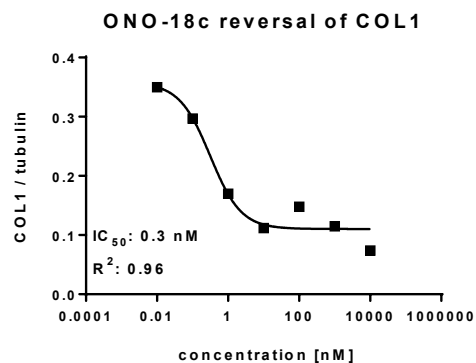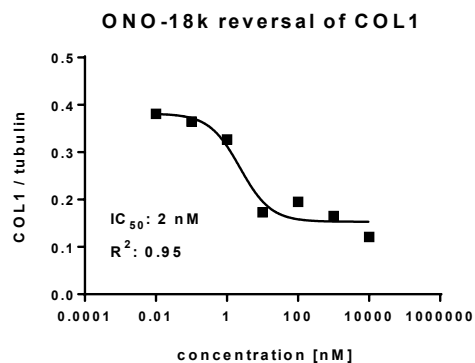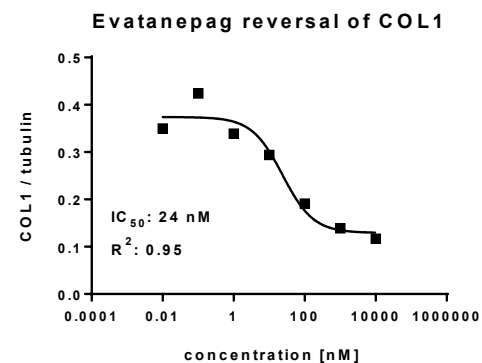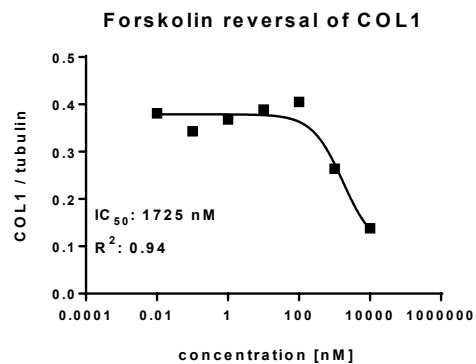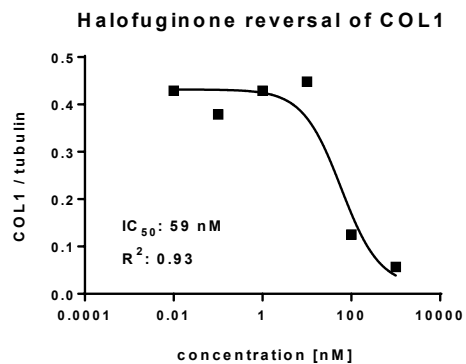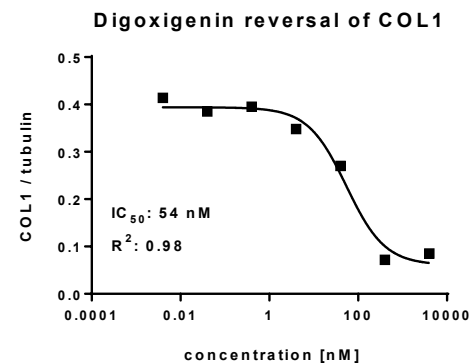

Supplement: pone.0207872.s011.pdf [file pone.0207872.s011.pdf]
