# Supplementary material for: Novel high–throughput myofibroblast assays identify agonists with therapeutic potential in pulmonary fibrosis that act via EP2 and EP4 receptors
Source: PubMed Central journal article supplement (PMC6261607; doi:10.1371/journal.pone.0207872), 2018-11-28
Supplement: pone.0207872.s001.pdf [file pone.0207872.s001.pdf]

# 1 Supplementary Material

## 2 S1 Table. Complete feature list and their weighted relevance for the differentiating 3 capability of the analysis pipeline

| Rank | Feature                                    | WeightSum   | Weights_0   |
|------|--------------------------------------------|-------------|-------------|
| 1    | Granularity_1_CorrFN_2                     | 10.01331338 | 10.01331338 |
| 2    | Granularity_1_CorrACT_1                    | 8.77621353  | 8.77621353  |
| 3    | Granularity_3_CorrACT_1                    | 8.583349788 | 8.583349788 |
| 4    | Granularity_3_CorrFN_2                     | 5.340851793 | 5.340851793 |
| 5    | Granularity_2_CorrACT_1                    | 5.250555548 | 5.250555548 |
| 6    | Granularity_6_CorrFN_2                     | 4.713900903 | 4.713900903 |
| 7    | Intensity_MeanIntensityEdge_CorrFN_1       | 4.151370198 | 4.151370198 |
| 8    | Granularity_4_CorrACT_1                    | 3.675790181 | 3.675790181 |
| 9    | Granularity_16_CorrFN_2                    | 3.452529283 | 3.452529283 |
| 10   | Granularity_2_CorrFN_2                     | 3.438477474 | 3.438477474 |
| 11   | Neighbors_SecondClosestDistance_Expanded_0 | 3.148662    | 3.148662    |
| 12   | Granularity_4_CorrFN_2                     | 3.033126438 | 3.033126438 |
| 13   | Granularity_5_CorrACT_1                    | 3.025140137 | 3.025140137 |
| 14   | Texture_SumAverage_CorrFN_3_0_1            | 2.876709315 | 2.876709315 |
| 15   | Granularity_5_CorrFN_2                     | 2.824770281 | 2.824770281 |
| 16   | Granularity_10_CorrFN_2                    | 2.703537969 | 2.703537969 |
| 17   | Granularity_8_CorrFN_2                     | 2.59733461  | 2.59733461  |
| 18   | Granularity_9_CorrFN_2                     | 2.53432678  | 2.53432678  |
| 19   | AreaShape_Solidity_1                       | 2.529930649 | 2.529930649 |
| 20   | Intensity_MinIntensity_CorrACT_1           | 2.450605699 | 2.450605699 |
| 21   | Intensity_MADIntensity_CorrACT_1           | 1.894352612 | 1.894352612 |
| 22   | Granularity_7_CorrFN_2                     | 1.880843441 | 1.880843441 |
| 23   | RadialDistribution_FracAtD_CorrFN_1of4_2   | 1.834428564 | 1.834428564 |
| 24   | Intensity_MeanIntensityEdge_CorrFN_2       | 1.75336316  | 1.75336316  |
| 25   | RadialDistribution_RadialCV_CorrFN_4of4_2  | 1.597057877 | 1.597057877 |

|    |                                                |             |             |
|----|------------------------------------------------|-------------|-------------|
| 26 | AreaShape_FormFactor_2                         | 1.501139599 | 1.501139599 |
| 27 | Texture_AngularSecondMoment_CorrACT_3_0_1      | 1.487525271 | 1.487525271 |
| 28 | Texture_InfoMeas1_CorrFN_3_0_1                 | 1.395888009 | 1.395888009 |
| 29 | Granularity_14_CorrFN_2                        | 1.35649062  | 1.35649062  |
| 30 | Texture_Gabor_CorrFN_3_2                       | 1.344524649 | 1.344524649 |
| 31 | Texture_InverseDifferenceMoment_CorrDAPI_3_0_0 | 1.269087887 | 1.269087887 |
| 32 | Intensity_IntegratedIntensityEdge_CorrFN_1     | 1.122772504 | 1.122772504 |
| 33 | Texture_InverseDifferenceMoment_CorrFN_3_0_0   | 1.086230661 | 1.086230661 |
| 34 | Granularity_15_CorrFN_2                        | 1.033514619 | 1.033514619 |
| 35 | Texture_DifferenceEntropy_CorrACT_3_0_1        | 0.957948696 | 0.957948696 |
| 36 | Granularity_7_CorrACT_1                        | 0.934765146 | 0.934765146 |
| 37 | Granularity_16_CorrACT_1                       | 0.918618585 | 0.918618585 |
| 38 | RadialDistribution_MeanFrac_CorrFN_3of4_2      | 0.887773492 | 0.887773492 |
| 39 | RadialDistribution_RadialCV_CorrFN_1of4_2      | 0.872478237 | 0.872478237 |
| 40 | AreaShape_Zernike_7_3_0                        | 0.855899651 | 0.855899651 |
| 41 | Texture_DifferenceVariance_CorrACT_3_0_1       | 0.811849555 | 0.811849555 |
| 42 | AreaShape_MinorAxisLength_1                    | 0.799998489 | 0.799998489 |
| 43 | Intensity_MaxIntensityEdge_CorrACT_1           | 0.755680065 | 0.755680065 |
| 44 | Intensity_MinIntensityEdge_CorrFN_2            | 0.73103481  | 0.73103481  |
| 45 | RadialDistribution_RadialCV_CorrACT_2of4_1     | 0.73023483  | 0.73023483  |
| 46 | Granularity_12_CorrACT_1                       | 0.72434858  | 0.72434858  |
| 47 | Texture_InfoMeas2_CorrDAPI_3_0_1               | 0.712379706 | 0.712379706 |
| 48 | Texture_DifferenceVariance_CorrACT_3_0_0       | 0.704637156 | 0.704637156 |
| 49 | Texture_Gabor_CorrACT_3_1                      | 0.637964129 | 0.637964129 |
| 50 | Intensity_MaxIntensityEdge_CorrACT_2           | 0.627479633 | 0.627479633 |
| 51 | Texture_DifferenceVariance_CorrFN_3_0_0        | 0.626404123 | 0.626404123 |
| 52 | Intensity_IntegratedIntensity_CorrACT_2        | 0.610972326 | 0.610972326 |
| 53 | Texture_InverseDifferenceMoment_CorrFN_3_0_1   | 0.610790892 | 0.610790892 |
| 54 | Granularity_13_CorrFN_2                        | 0.601998678 | 0.601998678 |

|    |                                               |             |             |
|----|-----------------------------------------------|-------------|-------------|
| 55 | RadialDistribution_RadialCV_CorrFN_1of4_1     | 0.597243935 | 0.597243935 |
| 56 | AreaShape_MajorAxisLength_2                   | 0.594952952 | 0.594952952 |
| 57 | Texture_InfoMeas1_CorrACT_3_0_1               | 0.58013592  | 0.58013592  |
| 58 | Texture_InfoMeas1_CorrFN_3_0_0                | 0.571444887 | 0.571444887 |
| 59 | AreaShape_Zernike_7_5_1                       | 0.558046168 | 0.558046168 |
| 60 | Granularity_11_CorrFN_2                       | 0.557850509 | 0.557850509 |
| 61 | Granularity_15_CorrACT_1                      | 0.557623947 | 0.557623947 |
| 62 | Texture_AngularSecondMoment_CorrDAPI_3_0_1    | 0.543461866 | 0.543461866 |
| 63 | Intensity_IntegratedIntensityEdge_CorrFN_2    | 0.534751958 | 0.534751958 |
| 64 | RadialDistribution_FracAtD_CorrFN_2of4_1      | 0.510743852 | 0.510743852 |
| 65 | Granularity_6_CorrACT_1                       | 0.504067477 | 0.504067477 |
| 66 | AreaShape_Zernike_9_9_1                       | 0.494023186 | 0.494023186 |
| 67 | Texture_Correlation_CorrDAPI_3_0_2            | 0.493682233 | 0.493682233 |
| 68 | Texture_DifferenceEntropy_CorrDAPI_3_0_0      | 0.493594196 | 0.493594196 |
| 69 | Texture_Gabor_CorrACT_3_0                     | 0.477984151 | 0.477984151 |
| 70 | Granularity_9_CorrACT_1                       | 0.476260128 | 0.476260128 |
| 71 | Texture_InfoMeas1_CorrDAPI_3_0_1              | 0.472507582 | 0.472507582 |
| 72 | Texture_Variance_CorrACT_3_0_1                | 0.467134699 | 0.467134699 |
| 73 | Texture_SumVariance_CorrFN_3_0_0              | 0.434800099 | 0.434800099 |
| 74 | Texture_InverseDifferenceMoment_CorrACT_3_0_0 | 0.433763572 | 0.433763572 |
| 75 | Texture_Gabor_CorrDAPI_3_2                    | 0.413979998 | 0.413979998 |
| 76 | Intensity_IntegratedIntensity_CorrFN_2        | 0.413358048 | 0.413358048 |
| 77 | AreaShape_Zernike_2_2_0                       | 0.412016655 | 0.412016655 |
| 78 | Texture_InfoMeas1_CorrFN_3_0_2                | 0.411224074 | 0.411224074 |
| 79 | Texture_Variance_CorrFN_3_0_1                 | 0.404369108 | 0.404369108 |
| 80 | Intensity_UpperQuartileIntensity_CorrFN_2     | 0.403875338 | 0.403875338 |
| 81 | AreaShape_Zernike_5_3_2                       | 0.40261658  | 0.40261658  |
| 82 | Texture_Gabor_CorrDAPI_3_1                    | 0.40183852  | 0.40183852  |
| 83 | Intensity_IntegratedIntensityEdge_CorrACT_2   | 0.392272362 | 0.392272362 |
| 84 | Texture_Variance_CorrDAPI_3_0_1               | 0.388572903 | 0.388572903 |

|     |                                            |             |             |
|-----|--------------------------------------------|-------------|-------------|
| 85  | Texture_Gabor_CorrACT_3_2                  | 0.38811043  | 0.38811043  |
| 86  | Texture_InfoMeas2_CorrACT_3_0_1            | 0.376651162 | 0.376651162 |
| 87  | AreaShape_Zernike_1_1_2                    | 0.375348071 | 0.375348071 |
| 88  | Intensity_MinIntensityEdge_CorrACT_1       | 0.372607158 | 0.372607158 |
| 89  | AreaShape_FormFactor_1                     | 0.369352323 | 0.369352323 |
| 90  | AreaShape_Zernike_1_1_0                    | 0.360522231 | 0.360522231 |
| 91  | AreaShape_Eccentricity_0                   | 0.358851453 | 0.358851453 |
| 92  | Texture_SumAverage_CorrDAPI_3_0_1          | 0.353173165 | 0.353173165 |
| 93  | AreaShape_Solidity_2                       | 0.352109834 | 0.352109834 |
| 94  | AreaShape_Zernike_7_1_1                    | 0.351767001 | 0.351767001 |
| 95  | Intensity_MinIntensityEdge_CorrFN_1        | 0.349182628 | 0.349182628 |
| 96  | Texture_InfoMeas2_CorrACT_3_0_2            | 0.341562147 | 0.341562147 |
| 97  | Texture_Correlation_CorrDAPI_3_0_0         | 0.339057655 | 0.339057655 |
| 98  | AreaShape_Zernike_9_5_2                    | 0.336531479 | 0.336531479 |
| 99  | AreaShape_Perimeter_2                      | 0.326366333 | 0.326366333 |
| 100 | Texture_SumVariance_CorrACT_3_0_1          | 0.317467554 | 0.317467554 |
| 101 | AreaShape_Zernike_4_4_1                    | 0.310640159 | 0.310640159 |
| 102 | RadialDistribution_RadialCV_CorrFN_2of4_2  | 0.310406037 | 0.310406037 |
| 103 | RadialDistribution_RadialCV_CorrACT_3of4_1 | 0.310136869 | 0.310136869 |
| 104 | RadialDistribution_FracAtD_CorrFN_3of4_1   | 0.308129374 | 0.308129374 |
| 105 | Granularity_13_CorrACT_1                   | 0.300777243 | 0.300777243 |
| 106 | RadialDistribution_FracAtD_CorrFN_3of4_2   | 0.292868407 | 0.292868407 |
| 107 | Texture_AngularSecondMoment_CorrDAPI_3_0_2 | 0.285682964 | 0.285682964 |
| 108 | RadialDistribution_RadialCV_CorrACT_4of4_2 | 0.271923329 | 0.271923329 |
| 109 | RadialDistribution_MeanFrac_CorrACT_3of4_2 | 0.265164967 | 0.265164967 |
| 110 | Intensity_StdIntensity_CorrFN_1            | 0.261451471 | 0.261451471 |
| 111 | Texture_Entropy_CorrDAPI_3_0_0             | 0.259420809 | 0.259420809 |
| 112 | AreaShape_Zernike_6_0_1                    | 0.25840834  | 0.25840834  |
| 113 | Texture_DifferenceEntropy_CorrFN_3_0_1     | 0.256767108 | 0.256767108 |
| 114 | Intensity_MADIntensity_CorrACT_2           | 0.256649849 | 0.256649849 |
| 115 | RadialDistribution_MeanFrac_CorrACT_3of4_1 | 0.253102423 | 0.253102423 |

|     |                                            |             |             |
|-----|--------------------------------------------|-------------|-------------|
| 116 | Texture_DifferenceVariance_CorrDAPI_3_0_0  | 0.250564088 | 0.250564088 |
| 117 | AreaShape_MajorAxisLength_1                | 0.24714089  | 0.24714089  |
| 118 | Intensity_MeanIntensity_CorrFN_2           | 0.244760684 | 0.244760684 |
| 119 | Texture_DifferenceEntropy_CorrACT_3_0_2    | 0.241938361 | 0.241938361 |
| 120 | Texture_SumVariance_CorrDAPI_3_0_0         | 0.238078351 | 0.238078351 |
| 121 | Texture_Contrast_CorrFN_3_0_0              | 0.238038621 | 0.238038621 |
| 122 | Intensity_MeanIntensityEdge_CorrACT_2      | 0.230215651 | 0.230215651 |
| 123 | Intensity_MassDisplacement_CorrACT_1       | 0.227904539 | 0.227904539 |
| 124 | Intensity_MeanIntensityEdge_CorrACT_1      | 0.224816704 | 0.224816704 |
| 125 | RadialDistribution_RadialCV_CorrFN_3of4_2  | 0.223742674 | 0.223742674 |
| 126 | Texture_Variance_CorrACT_3_0_0             | 0.221679492 | 0.221679492 |
| 127 | AreaShape_Compactness_2                    | 0.22013309  | 0.22013309  |
| 128 | AreaShape_Zernike_6_6_0                    | 0.218806372 | 0.218806372 |
| 129 | Texture_InfoMeas1_CorrDAPI_3_0_0           | 0.213401817 | 0.213401817 |
| 130 | Intensity_MassDisplacement_CorrACT_2       | 0.211672454 | 0.211672454 |
| 131 | RadialDistribution_RadialCV_CorrACT_2of4_2 | 0.209974023 | 0.209974023 |
| 132 | Intensity_MaxIntensityEdge_CorrFN_2        | 0.206613419 | 0.206613419 |
| 133 | AreaShape_MedianRadius_1                   | 0.205857689 | 0.205857689 |
| 134 | AreaShape_Zernike_8_2_1                    | 0.202160248 | 0.202160248 |
| 135 | AreaShape_Zernike_9_7_1                    | 0.201334857 | 0.201334857 |
| 136 | Texture_AngularSecondMoment_CorrFN_3_0_0   | 0.201087621 | 0.201087621 |
| 137 | AreaShape_Area_2                           | 0.199331925 | 0.199331925 |
| 138 | RadialDistribution_FracAtD_CorrACT_3of4_1  | 0.198592439 | 0.198592439 |
| 139 | RadialDistribution_RadialCV_CorrFN_4of4_1  | 0.197562965 | 0.197562965 |
| 140 | Texture_Correlation_CorrFN_3_0_0           | 0.194973537 | 0.194973537 |
| 141 | Texture_DifferenceEntropy_CorrFN_3_0_0     | 0.194824587 | 0.194824587 |
| 142 | Intensity_StdIntensityEdge_CorrFN_2        | 0.19470226  | 0.19470226  |
| 143 | AreaShape_Zernike_9_3_0                    | 0.192155265 | 0.192155265 |
| 144 | Texture_InfoMeas1_CorrACT_3_0_0            | 0.191168082 | 0.191168082 |
| 145 | Texture_Entropy_CorrFN_3_0_2               | 0.190698813 | 0.190698813 |
| 146 | AreaShape_Zernike_4_4_2                    | 0.190172972 | 0.190172972 |

|     |                                               |             |             |
|-----|-----------------------------------------------|-------------|-------------|
| 147 | RadialDistribution_FracAtD_CorrACT_3of4_2     | 0.189335568 | 0.189335568 |
| 148 | Texture_DifferenceVariance_CorrDAPI_3_0_2     | 0.188974221 | 0.188974221 |
| 149 | Texture_SumEntropy_CorrACT_3_0_0              | 0.185043357 | 0.185043357 |
| 150 | AreaShape_Eccentricity_1                      | 0.184182098 | 0.184182098 |
| 151 | Granularity_8_CorrACT_1                       | 0.184082916 | 0.184082916 |
| 152 | AreaShape_Zernike_4_0_0                       | 0.182435146 | 0.182435146 |
| 153 | AreaShape_MaxFeretDiameter_1                  | 0.181991653 | 0.181991653 |
| 154 | Intensity_MaxIntensityEdge_CorrFN_1           | 0.179956751 | 0.179956751 |
| 155 | AreaShape_Zernike_2_0_1                       | 0.172260317 | 0.172260317 |
| 156 | Intensity_StdIntensityEdge_CorrACT_1          | 0.17033879  | 0.17033879  |
| 157 | AreaShape_Zernike_6_2_1                       | 0.170186601 | 0.170186601 |
| 158 | Intensity_MaxIntensity_CorrFN_1               | 0.166391875 | 0.166391875 |
| 159 | Texture_InfoMeas2_CorrFN_3_0_1                | 0.164969889 | 0.164969889 |
| 160 | AreaShape_Extent_1                            | 0.16398657  | 0.16398657  |
| 161 | RadialDistribution_FracAtD_CorrFN_2of4_2      | 0.162830099 | 0.162830099 |
| 162 | Intensity_MinIntensity_CorrACT_2              | 0.159400245 | 0.159400245 |
| 163 | Intensity_MassDisplacement_CorrFN_2           | 0.159084811 | 0.159084811 |
| 164 | Texture_InverseDifferenceMoment_CorrACT_3_0_1 | 0.158956713 | 0.158956713 |
| 165 | AreaShape_Zernike_3_3_2                       | 0.158547821 | 0.158547821 |
| 166 | Texture_Correlation_CorrFN_3_0_1              | 0.158188484 | 0.158188484 |
| 167 | Texture_Contrast_CorrDAPI_3_0_1               | 0.157528326 | 0.157528326 |
| 168 | AreaShape_Zernike_7_3_2                       | 0.157425549 | 0.157425549 |
| 169 | AreaShape_Zernike_8_8_0                       | 0.156604209 | 0.156604209 |
| 170 | Texture_SumAverage_CorrDAPI_3_0_0             | 0.154670116 | 0.154670116 |
| 171 | Texture_SumAverage_CorrDAPI_3_0_2             | 0.152673621 | 0.152673621 |
| 172 | AreaShape_Compactness_0                       | 0.151515666 | 0.151515666 |
| 173 | AreaShape_Zernike_8_2_2                       | 0.151106962 | 0.151106962 |
| 174 | AreaShape_Zernike_3_1_2                       | 0.149390356 | 0.149390356 |
| 175 | Texture_Entropy_CorrFN_3_0_0                  | 0.149158945 | 0.149158945 |
| 176 | Granularity_11_CorrACT_1                      | 0.14739877  | 0.14739877  |
| 177 | AreaShape_MinFeretDiameter_1                  | 0.147317788 | 0.147317788 |

|     |                                                |             |             |
|-----|------------------------------------------------|-------------|-------------|
| 178 | AreaShape_Zernike_7_7_0                        | 0.146081138 | 0.146081138 |
| 179 | Texture_SumAverage_CorrFN_3_0_2                | 0.145164192 | 0.145164192 |
| 180 | Texture_Contrast_CorrDAPI_3_0_0                | 0.144693634 | 0.144693634 |
| 181 | Intensity_MaxIntensity_CorrACT_1               | 0.143995808 | 0.143995808 |
| 182 | AreaShape_Zernike_7_7_1                        | 0.143410129 | 0.143410129 |
| 183 | Texture_DifferenceVariance_CorrFN_3_0_2        | 0.140592424 | 0.140592424 |
| 184 | Texture_InfoMeas2_CorrDAPI_3_0_2               | 0.140493047 | 0.140493047 |
| 185 | Intensity_MassDisplacement_CorrFN_1            | 0.139793669 | 0.139793669 |
| 186 | AreaShape_FormFactor_0                         | 0.136699889 | 0.136699889 |
| 187 | AreaShape_Zernike_5_5_0                        | 0.1361727   | 0.1361727   |
| 188 | Intensity_IntegratedIntensity_CorrACT_1        | 0.135938316 | 0.135938316 |
| 189 | RadialDistribution_RadialCV_CorrFN_2of4_1      | 0.134731484 | 0.134731484 |
| 190 | AreaShape_MedianRadius_2                       | 0.134336287 | 0.134336287 |
| 191 | Granularity_14_CorrACT_1                       | 0.133265023 | 0.133265023 |
| 192 | Texture_SumVariance_CorrDAPI_3_0_1             | 0.12644638  | 0.12644638  |
| 193 | RadialDistribution_RadialCV_CorrACT_1of4_2     | 0.122915093 | 0.122915093 |
| 194 | RadialDistribution_MeanFrac_CorrACT_4of4_2     | 0.121478166 | 0.121478166 |
| 195 | Texture_InfoMeas2_CorrFN_3_0_0                 | 0.11808821  | 0.11808821  |
| 196 | AreaShape_Zernike_4_4_0                        | 0.117069049 | 0.117069049 |
| 197 | Granularity_10_CorrACT_1                       | 0.115542472 | 0.115542472 |
| 198 | Intensity_UpperQuartileIntensity_CorrFN_1      | 0.113622604 | 0.113622604 |
| 199 | Neighbors_NumberOfNeighbors_Expanded_0         | 0.11203779  | 0.11203779  |
| 200 | AreaShape_Zernike_9_9_0                        | 0.111801837 | 0.111801837 |
| 201 | Texture_SumEntropy_CorrDAPI_3_0_0              | 0.111413884 | 0.111413884 |
| 202 | Texture_Gabor_CorrFN_3_0                       | 0.110927778 | 0.110927778 |
| 203 | Texture_Gabor_CorrDAPI_3_0                     | 0.110647388 | 0.110647388 |
| 204 | RadialDistribution_MeanFrac_CorrFN_3of4_1      | 0.108888107 | 0.108888107 |
| 205 | AreaShape_Zernike_5_5_1                        | 0.108260725 | 0.108260725 |
| 206 | AreaShape_MedianRadius_0                       | 0.107760226 | 0.107760226 |
| 207 | Texture_InverseDifferenceMoment_CorrDAPI_3_0_1 | 0.107560543 | 0.107560543 |

|     |                                              |             |             |
|-----|----------------------------------------------|-------------|-------------|
| 208 | Texture_AngularSecondMoment_CorrACT_3_0_2    | 0.106405979 | 0.106405979 |
| 209 | Texture_Contrast_CorrFN_3_0_1                | 0.105988684 | 0.105988684 |
| 210 | Texture_SumEntropy_CorrDAPI_3_0_2            | 0.1054513   | 0.1054513   |
| 211 | Texture_InfoMeas1_CorrACT_3_0_2              | 0.10429728  | 0.10429728  |
| 212 | Intensity_MADIntensity_CorrFN_1              | 0.104061383 | 0.104061383 |
| 213 | AreaShape_Zernike_0_0_1                      | 0.103336424 | 0.103336424 |
| 214 | AreaShape_MinorAxisLength_0                  | 0.102786607 | 0.102786607 |
| 215 | AreaShape_Zernike_8_0_2                      | 0.10169128  | 0.10169128  |
| 216 | AreaShape_Zernike_6_6_2                      | 0.101493888 | 0.101493888 |
| 217 | RadialDistribution_MeanFrac_CorrFN_2of4_1    | 0.099668526 | 0.099668526 |
| 218 | Intensity_StdIntensityEdge_CorrFN_1          | 0.098155551 | 0.098155551 |
| 219 | Texture_SumEntropy_CorrDAPI_3_0_1            | 0.096693568 | 0.096693568 |
| 220 | AreaShape_Zernike_2_2_1                      | 0.095120409 | 0.095120409 |
| 221 | AreaShape_Zernike_8_0_0                      | 0.092508732 | 0.092508732 |
| 222 | Y                                            | 0.091462977 | 0.091462977 |
| 223 | Texture_Variance_CorrDAPI_3_0_0              | 0.090655828 | 0.090655828 |
| 224 | Intensity_LowerQuartileIntensity_CorrFN_2    | 0.088070721 | 0.088070721 |
| 225 | AreaShape_MaxFeretDiameter_2                 | 0.087552268 | 0.087552268 |
| 226 | Texture_InverseDifferenceMoment_CorrFN_3_0_2 | 0.087528957 | 0.087528957 |
| 227 | X                                            | 0.087162885 | 0.087162885 |
| 228 | AreaShape_Zernike_5_3_0                      | 0.081428744 | 0.081428744 |
| 229 | AreaShape_Extent_2                           | 0.078533746 | 0.078533746 |
| 230 | AreaShape_Zernike_9_1_1                      | 0.07818973  | 0.07818973  |
| 231 | AreaShape_Zernike_9_1_0                      | 0.077405024 | 0.077405024 |
| 232 | AreaShape_Zernike_6_2_2                      | 0.077254524 | 0.077254524 |
| 233 | AreaShape_Zernike_7_5_2                      | 0.077236039 | 0.077236039 |
| 234 | Intensity_MedianIntensity_CorrACT_1          | 0.07688111  | 0.07688111  |
| 235 | AreaShape_Zernike_0_0_2                      | 0.076387147 | 0.076387147 |
| 236 | Texture_SumAverage_CorrFN_3_0_0              | 0.075843794 | 0.075843794 |
| 237 | Texture_DifferenceVariance_CorrDAPI_3_0_1    | 0.075560477 | 0.075560477 |



|     |                                            |             |             |
|-----|--------------------------------------------|-------------|-------------|
| 238 | AreaShape_Zernike_8_0_1                    | 0.074041281 | 0.074041281 |
| 239 | RadialDistribution_MeanFrac_CorrACT_1of4_1 | 0.071598459 | 0.071598459 |
| 240 | AreaShape_Zernike_5_1_2                    | 0.068631172 | 0.068631172 |
| 241 | AreaShape_MaximumRadius_2                  | 0.06842179  | 0.06842179  |
| 242 | Texture_AngularSecondMoment_CorrFN_3_0_2   | 0.066443279 | 0.066443279 |
| 243 | Intensity_MinIntensity_CorrFN_1            | 0.065916044 | 0.065916044 |
| 244 | Intensity_StdIntensity_CorrACT_1           | 0.064912864 | 0.064912864 |
| 245 | Texture_Entropy_CorrACT_3_0_2              | 0.062394234 | 0.062394234 |
| 246 | AreaShape_Zernike_6_6_1                    | 0.061755178 | 0.061755178 |
| 247 | AreaShape_Zernike_7_1_0                    | 0.061549299 | 0.061549299 |
| 248 | AreaShape_Zernike_2_0_0                    | 0.060553445 | 0.060553445 |
| 249 | AreaShape_Zernike_8_6_2                    | 0.060315215 | 0.060315215 |
| 250 | RadialDistribution_RadialCV_CorrACT_3of4_2 | 0.059510039 | 0.059510039 |
| 251 | AreaShape_Zernike_2_2_2                    | 0.058621583 | 0.058621583 |
| 252 | Texture_SumEntropy_CorrFN_3_0_1            | 0.057844388 | 0.057844388 |
| 253 | Texture_DifferenceVariance_CorrACT_3_0_2   | 0.057838167 | 0.057838167 |
| 254 | RadialDistribution_FracAtD_CorrACT_2of4_1  | 0.056519031 | 0.056519031 |
| 255 | AreaShape_Zernike_9_1_2                    | 0.056305402 | 0.056305402 |
| 256 | AreaShape_Zernike_9_9_2                    | 0.0557882   | 0.0557882   |
| 257 | Texture_Correlation_CorrFN_3_0_2           | 0.055766007 | 0.055766007 |
| 258 | Texture_SumVariance_CorrACT_3_0_0          | 0.055438295 | 0.055438295 |
| 259 | AreaShape_Zernike_4_2_0                    | 0.054765079 | 0.054765079 |
| 260 | Texture_Contrast_CorrDAPI_3_0_2            | 0.054738017 | 0.054738017 |
| 261 | Texture_Contrast_CorrACT_3_0_0             | 0.054666988 | 0.054666988 |
| 262 | Intensity_LowerQuartileIntensity_CorrACT_1 | 0.054549901 | 0.054549901 |
| 263 | Texture_AngularSecondMoment_CorrACT_3_0_0  | 0.054302718 | 0.054302718 |
| 264 | Texture_Entropy_CorrDAPI_3_0_2             | 0.05402575  | 0.05402575  |
| 265 | AreaShape_MeanRadius_1                     | 0.053919555 | 0.053919555 |
| 266 | Texture_SumEntropy_CorrFN_3_0_0            | 0.053845026 | 0.053845026 |
| 267 | AreaShape_Zernike_8_6_1                    | 0.053298114 | 0.053298114 |
| 268 | Intensity_UpperQuartileIntensity_CorrACT_1 | 0.051430289 | 0.051430289 |

|     |                                                |             |             |
|-----|------------------------------------------------|-------------|-------------|
| 269 | Intensity_MaxIntensity_CorrACT_2               | 0.050522246 | 0.050522246 |
| 270 | AreaShape_Zernike_6_4_2                        | 0.049434372 | 0.049434372 |
| 271 | AreaShape_Zernike_3_1_0                        | 0.049190263 | 0.049190263 |
| 272 | Texture_Correlation_CorrACT_3_0_0              | 0.04769721  | 0.04769721  |
| 273 | RadialDistribution_MeanFrac_CorrACT_2of4_2     | 0.046414262 | 0.046414262 |
| 274 | AreaShape_Zernike_7_3_1                        | 0.046064272 | 0.046064272 |
| 275 | Intensity_StdIntensity_CorrACT_2               | 0.045201127 | 0.045201127 |
| 276 | AreaShape_Zernike_6_0_0                        | 0.04506589  | 0.04506589  |
| 277 | AreaShape_Eccentricity_2                       | 0.043297687 | 0.043297687 |
| 278 | RadialDistribution_RadialCV_CorrACT_4of4_1     | 0.04268633  | 0.04268633  |
| 279 | Texture_SumEntropy_CorrACT_3_0_1               | 0.042149793 | 0.042149793 |
| 280 | Texture_InverseDifferenceMoment_CorrDAPI_3_0_2 | 0.042008293 | 0.042008293 |
| 281 | Texture_Variance_CorrACT_3_0_2                 | 0.041827475 | 0.041827475 |
| 282 | AreaShape_MinFerretDiameter_0                  | 0.039534979 | 0.039534979 |
| 283 | AreaShape_Extent_0                             | 0.039370838 | 0.039370838 |
| 284 | Intensity_MinIntensityEdge_CorrACT_2           | 0.039290524 | 0.039290524 |
| 285 | RadialDistribution_FracAtD_CorrACT_1of4_2      | 0.038838731 | 0.038838731 |
| 286 | RadialDistribution_FracAtD_CorrACT_4of4_2      | 0.038703559 | 0.038703559 |
| 287 | Intensity_LowerQuartileIntensity_CorrFN_1      | 0.038424528 | 0.038424528 |
| 288 | Texture_AngularSecondMoment_CorrDAPI_3_0_0     | 0.038180106 | 0.038180106 |
| 289 | AreaShape_Compactness_1                        | 0.03748692  | 0.03748692  |
| 290 | AreaShape_Zernike_6_0_2                        | 0.037212828 | 0.037212828 |
| 291 | AreaShape_Zernike_9_7_0                        | 0.03658205  | 0.03658205  |
| 292 | RadialDistribution_FracAtD_CorrACT_2of4_2      | 0.036361147 | 0.036361147 |
| 293 | RadialDistribution_FracAtD_CorrACT_4of4_1      | 0.035661552 | 0.035661552 |
| 294 | Texture_SumEntropy_CorrFN_3_0_2                | 0.035425104 | 0.035425104 |
| 295 | AreaShape_Zernike_7_5_0                        | 0.035342814 | 0.035342814 |
| 296 | AreaShape_MeanRadius_2                         | 0.035140144 | 0.035140144 |
| 297 | Intensity_IntegratedIntensityEdge_CorrACT_1    | 0.034373624 | 0.034373624 |
| 298 | Texture_Entropy_CorrACT_3_0_1                  | 0.033742086 | 0.033742086 |

|     |                                            |             |             |
|-----|--------------------------------------------|-------------|-------------|
| 299 | AreaShape_MaximumRadius_0                  | 0.031085848 | 0.031085848 |
| 300 | Texture_DifferenceEntropy_CorrACT_3_0_0    | 0.029636418 | 0.029636418 |
| 301 | AreaShape_Zernike_0_0_0                    | 0.029291801 | 0.029291801 |
| 302 | RadialDistribution_MeanFrac_CorrACT_2of4_1 | 0.02834218  | 0.02834218  |
| 303 | Intensity_MaxIntensity_CorrFN_2            | 0.027703499 | 0.027703499 |
| 304 | AreaShape_Zernike_4_2_2                    | 0.027580011 | 0.027580011 |
| 305 | Granularity_12_CorrFN_2                    | 0.025861795 | 0.025861795 |
| 306 | Intensity_LowerQuartileIntensity_CorrACT_2 | 0.025836106 | 0.025836106 |
| 307 | Texture_InfoMeas2_CorrFN_3_0_2             | 0.024810177 | 0.024810177 |
| 308 | RadialDistribution_MeanFrac_CorrACT_4of4_1 | 0.024215003 | 0.024215003 |
| 309 | AreaShape_Zernike_5_5_2                    | 0.023409923 | 0.023409923 |
| 310 | AreaShape_Zernike_8_4_2                    | 0.022886445 | 0.022886445 |
| 311 | RadialDistribution_FracAtD_CorrFN_4of4_2   | 0.022618545 | 0.022618545 |
| 312 | AreaShape_Orientation_2                    | 0.022391096 | 0.022391096 |
| 313 | AreaShape_Zernike_8_2_0                    | 0.021513391 | 0.021513391 |
| 314 | Intensity_MeanIntensity_CorrACT_1          | 0.021154441 | 0.021154441 |
| 315 | AreaShape_Zernike_9_3_2                    | 0.020713199 | 0.020713199 |
| 316 | Intensity_IntegratedIntensity_CorrFN_1     | 0.020368526 | 0.020368526 |
| 317 | Texture_AngularSecondMoment_CorrFN_3_0_1   | 0.019541604 | 0.019541604 |
| 318 | Intensity_MeanIntensity_CorrACT_2          | 0.018523581 | 0.018523581 |
| 319 | Texture_SumVariance_CorrFN_3_0_1           | 0.017541259 | 0.017541259 |
| 320 | AreaShape_Zernike_9_7_2                    | 0.016499057 | 0.016499057 |
| 321 | Neighbors_AngleBetweenNeighbors_Expanded_0 | 0.016105948 | 0.016105948 |
| 322 | AreaShape_MaxFeretDiameter_0               | 0.01608521  | 0.01608521  |
| 323 | AreaShape_Perimeter_1                      | 0.016032958 | 0.016032958 |
| 324 | AreaShape_Zernike_5_1_0                    | 0.015919989 | 0.015919989 |
| 325 | Intensity_MeanIntensity_CorrFN_1           | 0.015544902 | 0.015544902 |
| 326 | RadialDistribution_MeanFrac_CorrFN_4of4_1  | 0.015426987 | 0.015426987 |
| 327 | RadialDistribution_MeanFrac_CorrFN_1of4_2  | 0.015340151 | 0.015340151 |
| 328 | AreaShape_Zernike_8_8_2                    | 0.015157205 | 0.015157205 |
| 329 | AreaShape_Zernike_8_8_1                    | 0.014763226 | 0.014763226 |

|     |                                            |             |             |
|-----|--------------------------------------------|-------------|-------------|
| 330 | AreaShape_Zernike_8_4_0                    | 0.013738365 | 0.013738365 |
| 331 | Texture_Variance_CorrFN_3_0_2              | 0.013702567 | 0.013702567 |
| 332 | AreaShape_Zernike_6_2_0                    | 0.012850227 | 0.012850227 |
| 333 | Intensity_MedianIntensity_CorrFN_2         | 0.012813002 | 0.012813002 |
| 334 | AreaShape_Zernike_7_7_2                    | 0.012699105 | 0.012699105 |
| 335 | Texture_InfoMeas1_CorrDAPI_3_0_2           | 0.011800774 | 0.011800774 |
| 336 | AreaShape_MajorAxisLength_0                | 0.011602042 | 0.011602042 |
| 337 | Texture_Contrast_CorrACT_3_0_1             | 0.011502336 | 0.011502336 |
| 338 | Intensity_StdIntensity_CorrFN_2            | 0.011047436 | 0.011047436 |
| 339 | RadialDistribution_MeanFrac_CorrFN_2of4_2  | 0.010714344 | 0.010714344 |
| 340 | RadialDistribution_RadialCV_CorrACT_1of4_1 | 0.010036371 | 0.010036371 |
| 341 | Intensity_MedianIntensity_CorrACT_2        | 0.009943609 | 0.009943609 |
| 342 | Intensity_MinIntensity_CorrFN_2            | 0.009826137 | 0.009826137 |
| 343 | Neighbors_FirstClosestDistance_Expanded_0  | 0.009530806 | 0.009530806 |
| 344 | Intensity_StdIntensityEdge_CorrACT_2       | 0.007640399 | 0.007640399 |
| 345 | Texture_DifferenceEntropy_CorrDAPI_3_0_1   | 0.006739564 | 0.006739564 |
| 346 | Texture_Variance_CorrFN_3_0_0              | 0.006604816 | 0.006604816 |
| 347 | AreaShape_Perimeter_0                      | 0.006550028 | 0.006550028 |
| 348 | AreaShape_Zernike_4_0_2                    | 0.006035309 | 0.006035309 |
| 349 | Texture_InfoMeas2_CorrDAPI_3_0_0           | 0.005981091 | 0.005981091 |
| 350 | Texture_Entropy_CorrFN_3_0_1               | 0.005723631 | 0.005723631 |
| 351 | Texture_Variance_CorrDAPI_3_0_2            | 0.005649807 | 0.005649807 |
| 352 | AreaShape_Area_1                           | 0.005472249 | 0.005472249 |
| 353 | AreaShape_Zernike_1_1_1                    | 0.005464563 | 0.005464563 |
| 354 | Texture_Contrast_CorrFN_3_0_2              | 0.00542861  | 0.00542861  |
| 355 | RadialDistribution_FracAtD_CorrACT_1of4_1  | 0.005410851 | 0.005410851 |
| 356 | AreaShape_Zernike_2_0_2                    | 0.004553118 | 0.004553118 |
| 357 | AreaShape_Orientation_0                    | 0.004505048 | 0.004505048 |
| 358 | AreaShape_Zernike_7_1_2                    | 0.004362279 | 0.004362279 |
| 359 | AreaShape_Zernike_3_3_1                    | 0.004296689 | 0.004296689 |
| 360 | Texture_SumVariance_CorrDAPI_3_0_2         | 0.004276061 | 0.004276061 |

|     |                                               |             |             |
|-----|-----------------------------------------------|-------------|-------------|
| 361 | Intensity_MADIntensity_CorrFN_2               | 0.003963061 | 0.003963061 |
| 362 | Texture_InfoMeas2_CorrACT_3_0_0               | 0.003952856 | 0.003952856 |
| 363 | Texture_SumAverage_CorrACT_3_0_2              | 0.003430732 | 0.003430732 |
| 364 | AreaShape_Orientation_1                       | 0.002957359 | 0.002957359 |
| 365 | Neighbors_PercentTouching_Expanded_0          | 0.002881397 | 0.002881397 |
| 366 | AreaShape_Zernike_3_3_0                       | 0.002735426 | 0.002735426 |
| 367 | AreaShape_Zernike_9_5_0                       | 0.002545077 | 0.002545077 |
| 368 | Texture_SumVariance_CorrFN_3_0_2              | 0.002450483 | 0.002450483 |
| 369 | Intensity_MedianIntensity_CorrFN_1            | 0.002275261 | 0.002275261 |
| 370 | AreaShape_Zernike_5_3_1                       | 0.001998395 | 0.001998395 |
| 371 | AreaShape_Zernike_6_4_0                       | 0.001996358 | 0.001996358 |
| 372 | Texture_SumAverage_CorrACT_3_0_0              | 0.001979678 | 0.001979678 |
| 373 | Texture_Entropy_CorrACT_3_0_0                 | 0.001939507 | 0.001939507 |
| 374 | Texture_InverseDifferenceMoment_CorrACT_3_0_2 | 0.001898719 | 0.001898719 |
| 375 | Texture_Correlation_CorrACT_3_0_1             | 0.001844806 | 0.001844806 |
| 376 | Texture_SumAverage_CorrACT_3_0_1              | 0.001603636 | 0.001603636 |
| 377 | Texture_SumVariance_CorrACT_3_0_2             | 0.001573037 | 0.001573037 |
| 378 | Texture_DifferenceVariance_CorrFN_3_0_1       | 0.001566701 | 0.001566701 |
| 379 | AreaShape_Zernike_4_2_1                       | 0.001474742 | 0.001474742 |
| 380 | Texture_Entropy_CorrDAPI_3_0_1                | 0.001312661 | 0.001312661 |
| 381 | RadialDistribution_RadialCV_CorrFN_3of4_1     | 0.001294841 | 0.001294841 |
| 382 | AreaShape_Solidity_0                          | 0.001198277 | 0.001198277 |
| 383 | Intensity_UpperQuartileIntensity_CorrACT_2    | 0.00095392  | 0.00095392  |
| 384 | AreaShape_Area_0                              | 0.000925862 | 0.000925862 |
| 385 | AreaShape_Zernike_9_3_1                       | 0.000916562 | 0.000916562 |
| 386 | AreaShape_Zernike_4_0_1                       | 0.00082497  | 0.00082497  |
| 387 | Texture_DifferenceEntropy_CorrFN_3_0_2        | 0.000701506 | 0.000701506 |
| 388 | Texture_DifferenceEntropy_CorrDAPI_3_0_2      | 0.000551724 | 0.000551724 |
| 389 | AreaShape_Zernike_8_6_0                       | 0.000538798 | 0.000538798 |
| 390 | AreaShape_Zernike_9_5_1                       | 0.000534267 | 0.000534267 |
| 391 | Texture_Gabor_CorrFN_3_1                      | 0.000510658 | 0.000510658 |

|     |                                            |             |             |
|-----|--------------------------------------------|-------------|-------------|
| 392 | AreaShape_MinorAxisLength_2                | 0.000452481 | 0.000452481 |
| 393 | AreaShape_MaximumRadius_1                  | 0.000415525 | 0.000415525 |
| 394 | RadialDistribution_MeanFrac_CorrFN_1of4_1  | 0.000324058 | 0.000324058 |
| 395 | AreaShape_MinFeretDiameter_2               | 0.000305264 | 0.000305264 |
| 396 | RadialDistribution_FracAtD_CorrFN_1of4_1   | 0.000235107 | 0.000235107 |
| 397 | RadialDistribution_MeanFrac_CorrFN_4of4_2  | 0.000196443 | 0.000196443 |
| 398 | AreaShape_MeanRadius_0                     | 0.000159291 | 0.000159291 |
| 399 | Texture_Correlation_CorrDAPI_3_0_1         | 8.94761E-05 | 8.94761E-05 |
| 400 | AreaShape_Zernike_3_1_1                    | 8.19065E-05 | 8.19065E-05 |
| 401 | Texture_SumEntropy_CorrACT_3_0_2           | 7.74509E-05 | 7.74509E-05 |
| 402 | AreaShape_Zernike_5_1_1                    | 6.29617E-05 | 6.29617E-05 |
| 403 | Texture_Correlation_CorrACT_3_0_2          | 6.12988E-05 | 6.12988E-05 |
| 404 | AreaShape_EulerNumber_1                    | 4.63145E-05 | 4.63145E-05 |
| 405 | RadialDistribution_FracAtD_CorrFN_4of4_1   | 3.9456E-05  | 3.9456E-05  |
| 406 | AreaShape_Zernike_8_4_1                    | 2.26027E-05 | 2.26027E-05 |
| 407 | RadialDistribution_MeanFrac_CorrACT_1of4_2 | 2.02807E-05 | 2.02807E-05 |
| 408 | Texture_Contrast_CorrACT_3_0_2             | 5.27896E-06 | 5.27896E-06 |
| 409 | AreaShape_Zernike_6_4_1                    | 1.78849E-06 | 1.78849E-06 |

4  
5  
6  
7  
8  
9

S1 Table Legend: The features names can be read as follows: The first name, e.g. Granularity, specifies the computed feature with a certain parameter after the underscore. The second term specifies the channel name on which the feature has been calculated e.g.  $\alpha$ -SMA / Actin or FN. FN stands for Fibronectin, ACT for  $\alpha$ -SMA / Actin. The 'Corr' indicates that the channel image was corrected using a background correction algorithm. E.g. the feature "Granularity\_1\_CorrFN\_2" detects the object distribution of small speckles with a radius of one pixel in the FN channel. Details on feature description can be found here: <http://cellprofiler-manual.s3.amazonaws.com/CellProfiler-3.0.0/modules/measurement.html#>
