# Supplementary material for: Novel high–throughput myofibroblast assays identify agonists with therapeutic potential in pulmonary fibrosis that act via EP2 and EP4 receptors
Source: PubMed Central journal article supplement (PMC6261607; doi:10.1371/journal.pone.0207872), 2018-11-28
Supplement: pone.0207872.s002.pdf [file pone.0207872.s002.pdf]

1

2 **S2 Table. The 42 hits identified by screening 1,585 approved drugs with the HCA.**

| Name                         | Effect HCA at 10 $\mu$ M [% inhibition] | Effect on viability at 10 $\mu$ M [% reduction] | IC50 HCA [nM] | IC50 nuclear count [nM] |
|------------------------------|-----------------------------------------|-------------------------------------------------|---------------|-------------------------|
| Camptothecine (S+)           | 105                                     | 5                                               | 41            | >25,000                 |
| Proscillaridin A             | 101                                     | 12                                              | 1             | >25,000                 |
| Carfilzomib (PR-171)         | 100                                     | 52                                              | 4             | 20,100                  |
| Ouabain                      | 100                                     | 15                                              | 12            | >25,000                 |
| Lanatoside C                 | 100                                     | 19                                              | 35            | >25,000                 |
| Emetine                      | 100                                     | 25                                              | 71            | >25,000                 |
| Digoxigenin                  | 100                                     | 11                                              | 220           | >25,000                 |
| Alprostadil                  | 97                                      | -19                                             | 9             | >25,000                 |
| Digitoxigenin                | 93                                      | 22                                              | 39            | >25,000                 |
| Digoxin                      | 87                                      | 19                                              | 10            | >25,000                 |
| Daunorubicin hydrochloride   | 73                                      | 14                                              | 270           | 20,200                  |
| Cycloheximide                | 91                                      | 27                                              | 109           | >25,000                 |
| Mitoxantrone dihydrochloride | 101                                     | 31                                              | 620           | 19,000                  |
| Doxorubicin hydrochloride    | 64                                      | 20                                              | 450           | >25,000                 |
| Topotecan                    | 88                                      | 8                                               | 970           | >25,000                 |
| Dasatinib (BMS-354825)       | 89                                      | -10                                             | 1,020         | >25,000                 |
| Epirubicin hydrochloride     | 93                                      | 28                                              | 1,070         | 18,000                  |
| Haloprogin                   | 77                                      | 61                                              | 1,300         | 4,500                   |
| Crizotinib (PF-02341066)     | 63                                      | 66                                              | 1,500         | 16,000                  |
| Thiostrepton                 | 85                                      | -11                                             | 2,200         | 7,600                   |
| Dabrafenib (GSK2118436)      | 56                                      | 9                                               | 2,900         | >25,000                 |
| Azacytidine-5                | 97                                      | -4                                              | 3,200         | >25,000                 |
| Etravirine (TMC125)          | 100                                     | 29                                              | 3,900         | >25,000                 |
| Nifedipine                   | 79                                      | 29                                              | 4,700         | 7,300                   |
| Vorinostat                   | 101                                     | 24                                              | 5,400         | >25,000                 |
| Benzethonium chloride        | 78                                      | 72                                              | 5,500         | 13,000                  |
| Chlorhexidine                | 80                                      | 24                                              | 5,800         | 12,000                  |
| Dequalinium dichloride       | 67                                      | 39                                              | 5,800         | >25,000                 |
| Bazedoxifene HCl             | 89                                      | 55                                              | 5,800         | 9,070                   |
| Chloroxine                   | 80                                      | 14                                              | 5,900         | >25,000                 |
| Aminacrine                   | 97                                      | 2                                               | 6,000         | 24,000                  |
| Halofantrine hydrochloride   | 101                                     | 29                                              | 6,020         | 5,200                   |
| Hexachlorophene              | 93                                      | 8                                               | 6,700         | >25,000                 |
| Fenbendazole                 | 76                                      | 51                                              | 6,700         | 5,800                   |

|                                 |     |    |       |         |
|---------------------------------|-----|----|-------|---------|
| Astemizole                      | 105 | 49 | 6,800 | 8,300   |
| Ethacridine lactate monohydrate | 73  | -9 | 7,500 | >25,000 |
| PCI-32765 (Ibrutinib)           | 67  | 22 | 7,600 | >25,000 |
| Cilnidipine                     | 92  | 15 | 8,040 | >25,000 |
| Indatraline hydrochloride       | 67  | 20 | 8,060 | 11,000  |
| Thiethylperazine dimalate       | 76  | 34 | 8,500 | 13,000  |
| Estradiol Valerate              | 66  | 65 | 9,700 | 11,000  |
| GBR 12909 dihydrochloride       | 56  | 13 | 9,900 | 12,000  |

3
