# Supplementary material for: Novel high–throughput myofibroblast assays identify agonists with therapeutic potential in pulmonary fibrosis that act via EP2 and EP4 receptors
Source: PubMed Central journal article supplement (PMC6261607; doi:10.1371/journal.pone.0207872), 2018-11-28
Supplement: pone.0207872.s003.pdf [file pone.0207872.s003.pdf]

1 **S3 Table. Selectivity and potency of EP<sub>2</sub> receptor agonists.**

| Receptor /<br>Readout | EP2 / cAMP |          | EP4 / cAMP |          | EP2 / $\beta$ -arrestin |          | EP4 / $\beta$ -arrestin |          |
|-----------------------|------------|----------|------------|----------|-------------------------|----------|-------------------------|----------|
| Name                  | EC50 [nM]  | Emax (%) | EC50 [nM]  | Emax (%) | EC50 [nM]               | Emax (%) | EC50 [nM]               | Emax (%) |
| Alprostadil           | 0.04       | 100      | 10         | 110      | 520                     | 104      | 9                       | 110      |
| PGE2                  | 0.04       | 100      | 3          | 110      | 110                     | 103      | 4                       | 107      |
| ONO-18 c              | <0.01      | 98       | 5          | 64       | 52                      | 160      | 5,000                   | 26       |
| ONO-18 k              | 0.03       | 99       | >10,000    | 24       | 110                     | 32       | >10,000                 | 15       |
| Evatanepag            | 0.6        | 100      | >10,000    | 32       | 290                     | 41       | >10,000                 | 10       |

2 n.a.: not assessed.

3
