# Supplementary material for: Novel high–throughput myofibroblast assays identify agonists with therapeutic potential in pulmonary fibrosis that act via EP2 and EP4 receptors
Source: PubMed Central journal article supplement (PMC6261607; doi:10.1371/journal.pone.0207872), 2018-11-28
Supplement: pone.0207872.s004.pdf [file pone.0207872.s004.pdf]

1 **S4 Table. Effect of TGF- $\beta$ 1 on the  $\alpha$ -SMA / tubulin and COL1 / tubulin ratios in NHLF and**  
 2 **RLMyoF**

|                         | NHLF         |                             | RLMyoF                  |                |
|-------------------------|--------------|-----------------------------|-------------------------|----------------|
|                         | Control      | TGF- $\beta$ 1 <sup>1</sup> | Control                 | TGF- $\beta$ 1 |
| $\alpha$ -SMA / tubulin | 0.12 (n = 1) | 0.51 $\pm$ 0.06 (n = 6)     | 1.60 $\pm$ 0.15 (n = 5) | 1.67 (n = 1)   |
| COL1 / tubulin          | 0.05 (n = 1) | 0.33 $\pm$ 0.07 (n = 6)     | 0.29 $\pm$ 0.04 (n = 5) | 0.36 (n = 1)   |

3 <sup>1</sup>5ng/mL TGF- $\beta$ 1

4
