# Supplementary material for: Novel high–throughput myofibroblast assays identify agonists with therapeutic potential in pulmonary fibrosis that act via EP2 and EP4 receptors
Source: PubMed Central journal article supplement (PMC6261607; doi:10.1371/journal.pone.0207872), 2018-11-28

# S2 Fig

**A**

**Effect of Halofuginone on TGF- $\beta$ 1-stimulated NHLF**

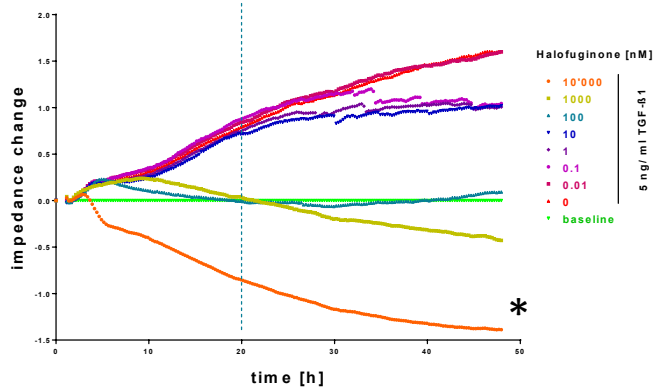

**B**

**IC<sub>50</sub> of Halofuginone on impedance**

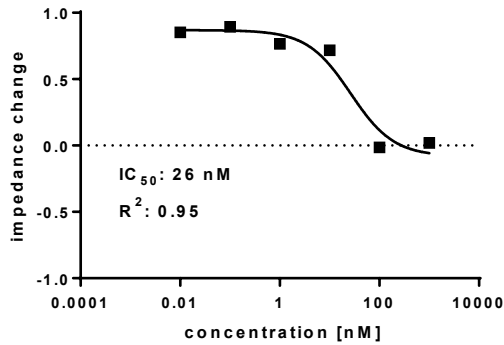

**C**

**Effect of Halofuginone on  $\alpha$ -SMA**

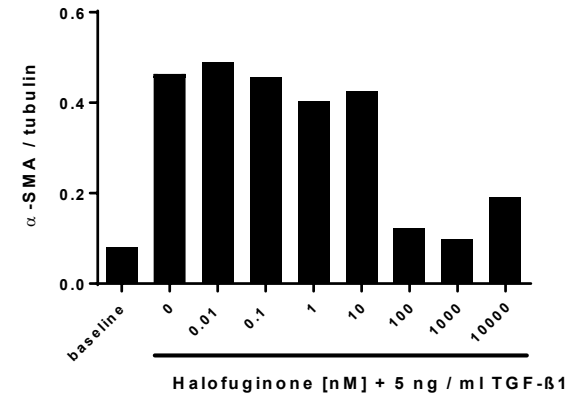

**D**

**IC<sub>50</sub> of Halofuginone on  $\alpha$ -SMA**

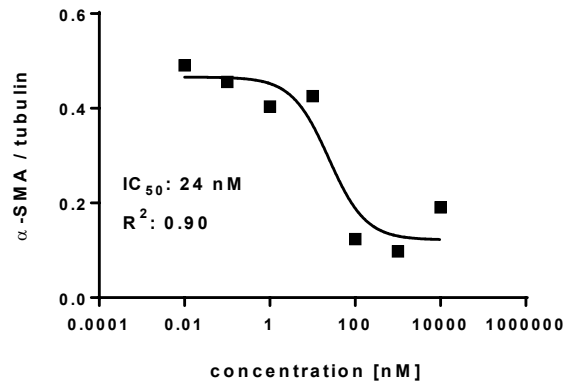

**E**

**Effect of Halofuginone on COL1**

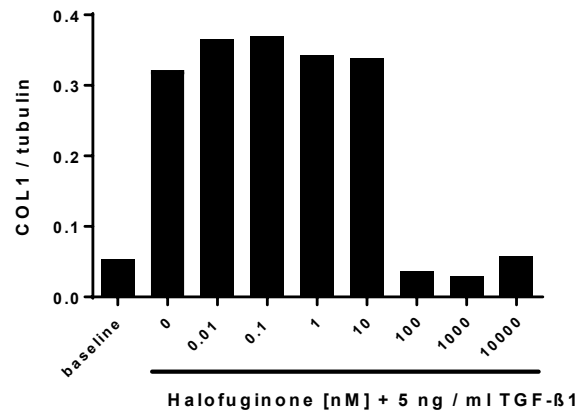

**F**

**IC<sub>50</sub> of Halofuginone on COL1**

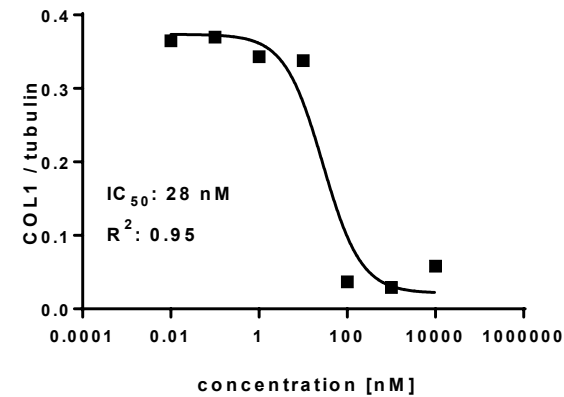

Supplement: pone.0207872.s006.pdf [file pone.0207872.s006.pdf]
