# Supplementary material for: Novel high–throughput myofibroblast assays identify agonists with therapeutic potential in pulmonary fibrosis that act via EP2 and EP4 receptors
Source: PubMed Central journal article supplement (PMC6261607; doi:10.1371/journal.pone.0207872), 2018-11-28

# S5 Fig

## A

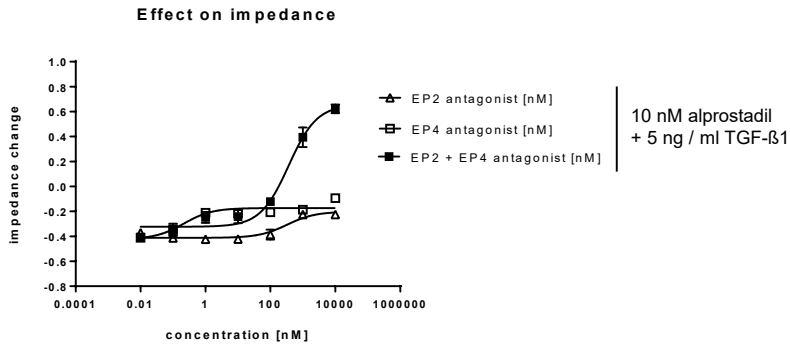

## B

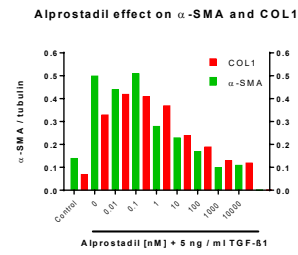

## C

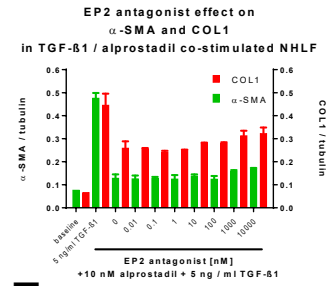

## D

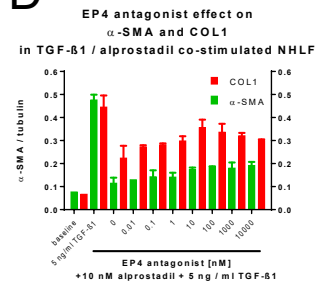

## E

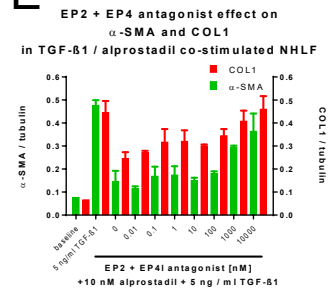

Supplement: pone.0207872.s009.pdf [file pone.0207872.s009.pdf]
